# Supplementary material
Source: ML conference proceedings conference paper supplement (https://proceedings.neurips.cc/paper_files/paper/2018/hash/90365351ccc7437a1309dc64e4db32a3-Abstract.html)
Supplement: Supplementary file [file 90365351ccc7437a1309dc64e4db32a3-Supplemental.zip]

## Appendix

### A Proof of Theorem 1

We analyze the convergence of ADAM for general minibatch size here. Theorem 1 is obtained by setting  $b = 1$ . Recall that the update of ADAM is the following

$$x_{t+1,i} = x_{t,i} - \eta_t \frac{g_{t,i}}{\sqrt{v_{t,i}} + \epsilon},$$

for all  $i \in [d]$ . Since the function  $f$  is  $L$ -smooth, we have the following:

$$\begin{aligned} f(x_{t+1}) &\leq f(x_t) + \langle \nabla f(x_t), x_{t+1} - x_t \rangle + \frac{L}{2} \|x_{t+1} - x_t\|^2 \\ &= f(x_t) - \eta_t \sum_{i=1}^d \left( [\nabla f(x_t)]_i \times \frac{g_{t,i}}{\sqrt{v_{t,i}} + \epsilon} \right) + \frac{L\eta_t^2}{2} \sum_{i=1}^d \frac{g_{t,i}^2}{(\sqrt{v_{t,i}} + \epsilon)^2} \end{aligned} \quad (2)$$

The second step follows simply from ADAM's update. We take the expectation of  $f(x_{t+1})$  in the above inequality:

$$\begin{aligned} \mathbb{E}_t[f(x_{t+1})] &\leq f(x_t) - \eta_t \sum_{i=1}^d \left( [\nabla f(x_t)]_i \times \mathbb{E}_t \left[ \frac{g_{t,i}}{\sqrt{v_{t,i}} + \epsilon} \right] \right) + \frac{L\eta_t^2}{2} \sum_{i=1}^d \mathbb{E}_t \left[ \frac{g_{t,i}^2}{(\sqrt{v_{t,i}} + \epsilon)^2} \right] \\ &= f(x_t) - \eta_t \sum_{i=1}^d \left( [\nabla f(x_t)]_i \times \mathbb{E}_t \left[ \frac{g_{t,i}}{\sqrt{v_{t,i}} + \epsilon} - \frac{g_{t,i}}{\sqrt{\beta_2 v_{t-1,i}} + \epsilon} + \frac{g_{t,i}}{\sqrt{\beta_2 v_{t-1,i}} + \epsilon} \right] \right) \\ &\quad + \frac{L\eta_t^2}{2} \sum_{i=1}^d \mathbb{E}_t \left[ \frac{g_{t,i}^2}{(\sqrt{v_{t,i}} + \epsilon)^2} \right] \\ &= f(x_t) - \eta_t \sum_{i=1}^d \left( [\nabla f(x_t)]_i \times \left[ \frac{[\nabla f(x_t)]_i}{\sqrt{\beta_2 v_{t-1,i}} + \epsilon} + \mathbb{E}_t \left[ \frac{g_{t,i}}{\sqrt{v_{t,i}} + \epsilon} - \frac{g_{t,i}}{\sqrt{\beta_2 v_{t-1,i}} + \epsilon} \right] \right] \right) \\ &\quad + \frac{L\eta_t^2}{2} \sum_{i=1}^d \mathbb{E}_t \left[ \frac{g_{t,i}^2}{(\sqrt{v_{t,i}} + \epsilon)^2} \right] \\ &\leq f(x_t) - \eta_t \sum_{i=1}^d \frac{[\nabla f(x_t)]_i^2}{\sqrt{\beta_2 v_{t-1,i}} + \epsilon} + \eta_t \sum_{i=1}^d \underbrace{\left| [\nabla f(x_t)]_i \right| \mathbb{E}_t \left[ \frac{g_{t,i}}{\sqrt{v_{t,i}} + \epsilon} - \frac{g_{t,i}}{\sqrt{\beta_2 v_{t-1,i}} + \epsilon} \right]}_{T_1} \\ &\quad + \frac{L\eta_t^2}{2} \sum_{i=1}^d \mathbb{E}_t \left[ \frac{g_{t,i}^2}{(\sqrt{v_{t,i}} + \epsilon)^2} \right] \end{aligned} \quad (3)$$

The second equality follows from the fact that  $g_t$  is an unbiased estimate of  $\nabla f(x_t)$  i.e.,  $\mathbb{E}[g_t] = \nabla f(x_t)$ . This is possible because  $v_{t-1,i}$  is independent of  $S_t$  sampled at time step  $t$ . The terms  $T_1$  in the above inequality needs to be bounded in order to show convergence. We obtain the following bound on the term  $T_1$ :

$$\begin{aligned} T_1 &= \frac{g_{t,i}}{\sqrt{v_{t,i}} + \epsilon} - \frac{g_{t,i}}{\sqrt{\beta_2 v_{t-1,i}} + \epsilon} \\ &\leq |g_{t,i}| \times \left| \frac{1}{\sqrt{v_{t,i}} + \epsilon} - \frac{1}{\sqrt{\beta_2 v_{t-1,i}} + \epsilon} \right| \\ &= \frac{|g_{t,i}|}{(\sqrt{v_{t,i}} + \epsilon)(\sqrt{\beta_2 v_{t-1,i}} + \epsilon)} \times \left| \frac{v_{t,i} - \beta_2 v_{t-1,i}}{\sqrt{v_{t,i}} + \sqrt{\beta_2 v_{t-1,i}}} \right| \\ &= \frac{|g_{t,i}|}{(\sqrt{v_{t,i}} + \epsilon)(\sqrt{\beta_2 v_{t-1,i}} + \epsilon)} \times \frac{(1 - \beta_2)g_{t,i}^2}{\sqrt{v_{t,i}} + \sqrt{\beta_2 v_{t-1,i}}} \end{aligned}$$

The third equality is due to the definition of  $v_{t-1,i}$  and  $v_{t,i}$  in ADAM i.e.,  $v_{t,i} = \beta_2 v_{t-1,i} + (1-\beta_2)g_{t,i}^2$ . We further bound  $T_1$  in the following manner:

$$\begin{aligned} T_1 &\leq \frac{|g_{t,i}|}{(\sqrt{v_{t,i}} + \epsilon)(\sqrt{\beta_2 v_{t-1,i}} + \epsilon)} \times \frac{(1-\beta_2)g_{t,i}^2}{\sqrt{\beta_2 v_{t-1,i}} + (1-\beta_2)g_{t,i}^2 + \sqrt{\beta_2 v_{t-1,i}}} \\ &\leq \frac{1}{(\sqrt{v_{t,i}} + \epsilon)(\sqrt{\beta_2 v_{t-1,i}} + \epsilon)} \times \sqrt{1-\beta_2}g_{t,i}^2 \\ &\leq \frac{\sqrt{1-\beta_2}g_{t,i}^2}{(\sqrt{\beta_2 v_{t-1,i}} + \epsilon)\epsilon}. \end{aligned}$$

Here, the third inequality is obtained by dropping  $v_{t,i}$  from the denominator to obtain an upper bound. The second inequality is due to the fact that

$$\frac{|g_{t,i}|}{\sqrt{\beta_2 v_{t-1,i}} + (1-\beta_2)g_{t,i}^2} \leq \frac{1}{\sqrt{1-\beta_2}}.$$

Note that the bound of coordinates of gradient of  $\ell$  automatically provides a bound on  $[\nabla f(x_t)]_i$  i.e.,  $|\nabla f(x_t)|_i \leq G$  for all  $i \in [d]$ . Substituting the above bound on  $T_1$  in Equation (3) and using the bound on  $[\nabla f(x_t)]_i$ , we have the following:

$$\begin{aligned} \mathbb{E}_t[f(x_{t+1})] &\leq f(x_t) - \eta_t \sum_{i=1}^d \frac{[\nabla f(x_t)]_i^2}{\sqrt{\beta_2 v_{t-1,i}} + \epsilon} + \frac{\eta_t G \sqrt{1-\beta_2}}{\epsilon} \sum_{i=1}^d \mathbb{E}_t \left[ \frac{g_{t,i}^2}{\sqrt{\beta_2 v_{t-1,i}} + \epsilon} \right] \\ &\quad + \frac{L\eta_t^2}{2\epsilon} \sum_{i=1}^d \mathbb{E}_t \left[ \frac{g_{t,i}^2}{\sqrt{v_{t,i}} + \epsilon} \right] \\ &\leq f(x_t) - \eta_t \sum_{i=1}^d \frac{[\nabla f(x_t)]_i^2}{\sqrt{\beta_2 v_{t-1,i}} + \epsilon} + \frac{\eta_t G \sqrt{1-\beta_2}}{\epsilon} \sum_{i=1}^d \mathbb{E}_t \left[ \frac{g_{t,i}^2}{\sqrt{\beta_2 v_{t-1,i}} + \epsilon} \right] \\ &\quad + \frac{L\eta_t^2}{2\epsilon} \sum_{i=1}^d \mathbb{E}_t \left[ \frac{g_{t,i}^2}{\sqrt{\beta_2 v_{t-1,i}} + \epsilon} \right] \\ &\leq f(x_t) - \left( \eta_t - \frac{\eta_t G \sqrt{1-\beta_2}}{\epsilon} - \frac{L\eta_t^2}{2\epsilon} \right) \sum_{i=1}^d \frac{[\nabla f(x_t)]_i^2}{\sqrt{\beta_2 v_{t-1,i}} + \epsilon} \\ &\quad + \left( \frac{\eta_t G \sqrt{1-\beta_2}}{\epsilon} + \frac{L\eta_t^2}{2\epsilon} \right) \sum_{i=1}^d \frac{\sigma_i^2}{b\sqrt{\beta_2 v_{t-1,i}} + \epsilon}. \end{aligned}$$

The first inequality follows from the fact that  $|\nabla f(x_t)|_i \leq G$ . The third inequality follows from Lemma 1. The application of Lemma 1 is possible because  $v_{t-1,i}$  is independent of random variables in  $|S_t|$ . The second inequality is due to the following inequality:  $v_{t,i} \geq \beta_2 v_{t-1,i}$ . This is obtained from the definition of  $v_{t,i}$  in ADAM i.e.,  $v_{t,i} = \beta_2 v_{t-1,i} + (1-\beta_2)g_{t,i}^2$ . From the parameters  $\eta_t$ ,  $\epsilon$  and  $\beta_2$  stated in our theorem, we see that the following conditions hold:  $\frac{L\eta_t}{2\epsilon} \leq \frac{1}{4}$  and

$$\frac{G\sqrt{1-\beta_2}}{\epsilon} \leq \frac{1}{4}.$$

Using these inequalities in Equation (3), we obtain

$$\begin{aligned} \mathbb{E}_t[f(x_{t+1})] &\leq f(x_t) - \frac{\eta_t}{2} \sum_{i=1}^d \frac{[\nabla f(x_t)]_i^2}{\sqrt{\beta_2 v_{t-1,i}} + \epsilon} + \left( \frac{\eta_t G \sqrt{1-\beta_2}}{\epsilon} + \frac{L\eta_t^2}{2\epsilon} \right) \sum_{i=1}^d \frac{\sigma_i^2}{b(\sqrt{\beta_2 v_{t-1,i}} + \epsilon)} \\ &\leq f(x_t) - \frac{\eta_t}{2(\sqrt{\beta_2}G + \epsilon)} \|\nabla f(x_t)\|^2 + \left( \frac{\eta_t G \sqrt{1-\beta_2}}{\epsilon^2} + \frac{L\eta_t^2}{2\epsilon^2} \right) \frac{\sigma^2}{b} \end{aligned}$$

The second inequality follows from the fact that  $0 \leq v_{t-1,i} \leq G^2$ . Using telescoping sum and rearranging the inequality, we obtain

$$\frac{\eta}{2(\sqrt{\beta_2}G + \epsilon)} \sum_{t=1}^T \mathbb{E} \|\nabla f(x_t)\|^2 \leq f(x_1) - \mathbb{E}[f(x_{T+1})] + \left( \frac{\eta G \sqrt{1-\beta_2}}{\epsilon^2} + \frac{L\eta^2}{2\epsilon^2} \right) \frac{T\sigma^2}{b}. \quad (4)$$

Multiplying with  $\frac{2(\sqrt{\beta_2}G+\epsilon)}{T\eta}$  on both sides and using the fact that  $f(x^*) \leq f(x_{t+1})$ , we obtain the following:

$$\frac{1}{T} \sum_{t=1}^T \mathbb{E} \|\nabla f(x_t)\|^2 \leq 2(\sqrt{\beta_2}G + \epsilon) \times \left[ \frac{f(x_1) - f(x^*)}{\eta T} + \left( \frac{G\sqrt{1-\beta_2}}{\epsilon^2} + \frac{L\eta}{2\epsilon^2} \right) \frac{\sigma^2}{b} \right],$$

which gives us the desired result.

## B Proof of Theorem 2

The proof follows along similar lines as Theorem 1 with some important differences. We, again, analyze the convergence of YOGI for general minibatch size here. Theorem 2 is obtained by setting  $b = 1$ . We start with the following observation:

$$\begin{aligned} f(x_{t+1}) &\leq f(x_t) + \langle \nabla f(x_t), x_{t+1} - x_t \rangle + \frac{L}{2} \|x_{t+1} - x_t\|^2 \\ &= f(x_t) - \eta_t \sum_{i=1}^d \left( [\nabla f(x_t)]_i \times \frac{g_{t,i}}{\sqrt{v_{t,i}} + \epsilon} \right) + \frac{L\eta_t^2}{2} \sum_{i=1}^d \frac{g_{t,i}^2}{(\sqrt{v_{t,i}} + \epsilon)^2} \end{aligned} \quad (5)$$

The first step follows from the  $L$ -smoothness of the function  $f$ . The second step follows from the definition of YOGI update step i.e.,

$$x_{t+1,i} = x_{t,i} - \eta_t \frac{g_{t,i}}{\sqrt{v_{t,i}} + \epsilon},$$

for all  $i \in [d]$ . Taking the expectation at time step  $t$  in Equation (2), we get the following:

$$\begin{aligned} \mathbb{E}_t[f(x_{t+1})] &\leq f(x_t) - \eta_t \sum_{i=1}^d \left( [\nabla f(x_t)]_i \times \mathbb{E}_t \left[ \frac{g_{t,i}}{\sqrt{v_{t,i}} + \epsilon} \right] \right) + \frac{L\eta_t^2}{2} \sum_{i=1}^d \mathbb{E}_t \left[ \frac{g_{t,i}^2}{(\sqrt{v_{t,i}} + \epsilon)^2} \right] \\ &= f(x_t) - \eta_t \sum_{i=1}^d \left( [\nabla f(x_t)]_i \times \mathbb{E}_t \left[ \frac{g_{t,i}}{\sqrt{v_{t,i}} + \epsilon} - \frac{g_{t,i}}{\sqrt{v_{t-1,i}} + \epsilon} + \frac{g_{t,i}}{\sqrt{v_{t-1,i}} + \epsilon} \right] \right) \\ &\quad + \frac{L\eta_t^2}{2} \sum_{i=1}^d \mathbb{E}_t \left[ \frac{g_{t,i}^2}{(\sqrt{v_{t,i}} + \epsilon)^2} \right] \\ &\leq f(x_t) - \eta_t \sum_{i=1}^d \frac{[\nabla f(x_t)]_i^2}{\sqrt{v_{t-1,i}} + \epsilon} + \eta_t \sum_{i=1}^d \underbrace{|\mathbb{E}_t \left[ \frac{g_{t,i}}{\sqrt{v_{t,i}} + \epsilon} - \frac{g_{t,i}}{\sqrt{v_{t-1,i}} + \epsilon} \right]|}_{T_1} \\ &\quad + \underbrace{\frac{L\eta_t^2}{2} \sum_{i=1}^d \mathbb{E}_t \left[ \frac{g_{t,i}^2}{(\sqrt{v_{t,i}} + \epsilon)^2} \right]}_{T_2}. \end{aligned} \quad (6)$$

The second equality follows from the fact that  $g_t$  is an unbiased estimate of  $\nabla f(x_t)$  i.e.,  $\mathbb{E}[g_t] = \nabla f(x_t)$ . The key difference here in comparison to proof of Theorem 1 is that the deviation to bound in  $T_1$  is from  $\frac{g_{t,i}}{\sqrt{v_{t-1,i}} + \epsilon}$  as opposed to  $\frac{g_{t,i}}{\sqrt{\beta_2 v_{t-1,i}} + \epsilon}$  in proof of ADAM. Our aim is to bound the terms  $T_1$  and  $T_2$  in the above inequality. We bound the term  $T_1$  in the following manner:

$$\begin{aligned} T_1 &\leq |g_{t,i}| \left| \frac{1}{\sqrt{v_{t,i}} + \epsilon} - \frac{1}{\sqrt{v_{t-1,i}} + \epsilon} \right| \\ &= \frac{|g_{t,i}|}{(\sqrt{v_{t,i}} + \epsilon)(\sqrt{v_{t-1,i}} + \epsilon)} \left| \frac{v_{t,i} - v_{t-1,i}}{\sqrt{v_{t,i}} + \sqrt{v_{t-1,i}}} \right| \\ &= \frac{|g_{t,i}|}{(\sqrt{v_{t,i}} + \epsilon)(\sqrt{v_{t-1,i}} + \epsilon)} \times \frac{(1 - \beta_2)g_{t,i}^2}{\sqrt{v_{t,i}} + \sqrt{v_{t-1,i}}} \leq \frac{\sqrt{1 - \beta_2}g_{t,i}^2}{(\sqrt{v_{t-1,i}} + \epsilon)\epsilon}. \end{aligned}$$

The second equality is from the update rule of YOGI which is  $v_{t,i} = v_{t-1,i} - (1 - \beta_2)\text{sign}(v_{t-1,i} - g_{t,i}^2)g_{t,i}^2$ . The last inequality is due to the fact that

$$\frac{|g_{t,i}|}{\sqrt{v_{t,i}} + \sqrt{v_{t-1,i}}} \leq \frac{1}{\sqrt{1 - \beta_2}}.$$

The above inequality in turn follows from the fact that either  $\frac{|g_{t,i}|}{\sqrt{v_{t-1,i}}} \leq 1$  when  $v_{t-1,i} \geq g_{t,i}^2$  or  $\frac{|g_{t,i}|}{\sqrt{v_{t,i}}} \leq \frac{1}{\sqrt{1 - \beta_2}}$  when  $v_{t-1,i} < g_{t,i}^2$ . We next bound the term  $T_2$  as follows:

$$T_2 = \frac{L\eta_t^2}{2} \sum_{i=1}^d \mathbb{E}_t \left[ \frac{g_{t,i}^2}{(\sqrt{v_{t,i}} + \epsilon)^2} \right] \leq \frac{L\eta_t^2}{2\epsilon\sqrt{\beta_2}} \sum_{i=1}^d \mathbb{E}_t \left[ \frac{g_{t,i}^2}{\sqrt{v_{t-1,i}} + \epsilon} \right].$$

The inequality is due to the following :  $v_{t,i} \geq \beta_2 v_{t-1,i}$ . To see this, first note that  $v_{t,i} = v_{t-1,i} - (1 - \beta_2)\text{sign}(v_{t-1,i} - g_{t,i}^2)g_{t,i}^2$ . If  $v_{t-1,i} \leq g_{t,i}^2$ , then it is easy to see that  $v_{t,i} \geq v_{t-1,i}$ . Consider the case where  $v_{t-1,i} > g_{t,i}^2$ , then we have

$$v_{t,i} = v_{t-1,i} - (1 - \beta_2)g_{t,i}^2 \geq \beta_2 v_{t-1,i}.$$

Therefore,  $v_{t,i} \geq \beta_2 v_{t-1,i}$ . Substituting the above bounds on  $T_1$  and  $T_2$  in Equation (6), we obtain the following bound:

$$\begin{aligned} \mathbb{E}_t[f(x_{t+1})] &\leq f(x_t) - \eta_t \sum_{i=1}^d \frac{[\nabla f(x_t)]_i^2}{\sqrt{v_{t-1,i}} + \epsilon} + \frac{\eta_t G \sqrt{1 - \beta_2}}{\epsilon} \sum_{i=1}^d \mathbb{E}_t \left[ \frac{g_{t,i}^2}{\sqrt{v_{t-1,i}} + \epsilon} \right] \\ &\quad + \frac{L\eta_t^2}{2\epsilon\sqrt{\beta_2}} \sum_{i=1}^d \mathbb{E}_t \left[ \frac{g_{t,i}^2}{\sqrt{v_{t-1,i}} + \epsilon} \right] \\ &\leq f(x_t) - \left( \eta_t - \frac{\eta_t G \sqrt{1 - \beta_2}}{\epsilon} - \frac{L\eta_t^2}{2\epsilon\sqrt{\beta_2}} \right) \sum_{i=1}^d \frac{[\nabla f(x_t)]_i^2}{\sqrt{v_{t-1,i}} + \epsilon} \\ &\quad + \left( \frac{\eta_t G^2 (1 - \beta_2)}{2\epsilon} + \frac{L\eta_t^2}{2\epsilon\sqrt{\beta_2}} \right) \sum_{i=1}^d \frac{\sigma_i^2}{b\sqrt{v_{t-1,i}} + \epsilon}. \end{aligned}$$

The first inequality follows from the fact that  $|\nabla f(x_t)|_i \leq G$ . The second inequality follows from Lemma 1. Now, from our theorem result, we observe that,

$$\begin{aligned} \frac{G\sqrt{1 - \beta_2}}{\epsilon} &\leq \frac{1}{4}, \\ \frac{L\eta_t}{2\epsilon\sqrt{\beta_2}} &\leq \frac{1}{4}. \end{aligned}$$

Using these inequalities in Equation (6), we obtain

$$\begin{aligned} \mathbb{E}_t[f(x_{t+1})] &\leq f(x_t) - \frac{\eta_t}{2} \sum_{i=1}^d \frac{[\nabla f(x_t)]_i^2}{\sqrt{v_{t-1,i}} + \epsilon} + \left( \frac{\eta_t G \sqrt{1 - \beta_2}}{\epsilon} + \frac{L\eta_t^2}{2\epsilon\sqrt{\beta_2}} \right) \sum_{i=1}^d \frac{\sigma_i^2}{b\sqrt{v_{t-1,i}} + \epsilon} \\ &\leq f(x_t) - \frac{\eta_t}{2(\sqrt{2}G + \epsilon)} \|\nabla f(x_t)\|^2 + \left( \frac{\eta_t G \sqrt{1 - \beta_2}}{\epsilon^2} + \frac{L\eta_t^2}{2\epsilon^2\sqrt{\beta_2}} \right) \frac{\sigma^2}{b} \end{aligned}$$

The second inequality follows from the fact that  $0 \leq v_{t-1,i} \leq 2G^2$ . Using telescoping sum and rearranging the inequality, we obtain

$$\frac{\eta}{2(\sqrt{2}G + \epsilon)} \sum_{t=1}^T \mathbb{E} \|\nabla f(x_t)\|^2 \leq f(x_1) - \mathbb{E}[f(x_{T+1})] + \left( \frac{\eta G \sqrt{1 - \beta_2}}{\epsilon^2} + \frac{L\eta^2}{2\epsilon^2\sqrt{\beta_2}} \right) \frac{T\sigma^2}{b}. \quad (7)$$

Multiplying with  $\frac{2(\sqrt{2}G + \epsilon)}{\eta}$  on both sides and using the fact that  $f(x^*) \leq f(x_{t+1})$  gives us the desired result.

## C Auxiliary Lemma

The following result is useful for bounding the variance of the updates of the algorithms in this paper.

**Lemma 1.** *For the iterates  $x_t$  where  $t \in [T]$  in Algorithm 1 and 2, the following inequality holds:*

$$\mathbb{E}_t[\|g_{t,i}\|^2] \leq \frac{\sigma_i^2}{b} + [\nabla f(x_t)]_i^2,$$

for all  $i \in [d]$ .

*Proof.* Let us define the following notation for the ease of exposition:

$$\zeta_t = \frac{1}{|S_t|} \sum_{s \in S_t} ([\nabla \ell(x_t, s)]_i - [\nabla f(x_t)]_i).$$

Using this notation, we obtain the following bound:

$$\begin{aligned} \mathbb{E}_t[g_{t,i}^2] &= \mathbb{E}_t[\|\zeta_t + \nabla f(x_t)\|^2] \\ &= \mathbb{E}_t[\zeta_t^2] + [\nabla f(x_t)]_i^2 \\ &= \frac{1}{b^2} \mathbb{E}_t \left[ \left( \sum_{s \in S_t} ([\nabla \ell(x_t, s)]_i - [\nabla f(x_t)]_i) \right)^2 \right] + [\nabla f(x_t)]_i^2 \\ &= \frac{1}{b^2} \mathbb{E}_t \left[ \sum_{s \in S_t} ([\nabla \ell(x_t, s)]_i - [\nabla f(x_t)]_i)^2 \right] + [\nabla f(x_t)]_i^2 \\ &\leq \frac{\sigma_i^2}{b} + [\nabla f(x_t)]_i^2. \end{aligned}$$

The second equality is due to the fact that  $\zeta_t$  is a mean 0 random variable. The third equality follows from Lemma 2. The last inequality is due to the fact that  $\mathbb{E}_{s \sim \mathbb{P}}[(\nabla \ell(x_t, s)]_i - [\nabla f(x_t)]_i)^2] \leq \sigma_i^2$  for all  $x \in \mathbb{R}^d$ .  $\square$

**Lemma 2.** *For random variables  $z_1, \dots, z_r$  are independent and mean 0, we have*

$$\mathbb{E}[\|z_1 + \dots + z_r\|^2] = \mathbb{E}[\|z_1\|^2 + \dots + \|z_r\|^2].$$

*Proof.* We have the following:

$$\mathbb{E}[\|z_1 + \dots + z_r\|^2] = \sum_{i,j=1}^r \mathbb{E}[z_i z_j] = \mathbb{E}[\|z_1\|^2 + \dots + \|z_r\|^2].$$

The second equality follows from the fact that  $z_i$ 's are independent and mean 0.  $\square$

## D More Experiment Results

Table 5: Train and test loss comparison for Deep AutoEncoders. Standard errors with  $2\sigma$  are shown over 6 runs are shown. All our experiments were run for 5000 epochs utilizing the ReduceLRonPlateau schedule with patience of 20 epochs and decay factor of 0.5 with a batch size of 128. Also we report numbers from prior work for reference, but their experimental setup (batch-size, learning rate, etc) are different.

| Method          | LR        | $\beta_1$ | $\beta_2$ | $\epsilon$ | CURVES          |                                   |
|-----------------|-----------|-----------|-----------|------------|-----------------|-----------------------------------|
|                 |           |           |           |            | Train Loss      | Test Loss                         |
| PT + NCG [20]   | -         | -         | -         | -          | 0.74            | 0.82                              |
| RAND+HF [20]    | -         | -         | -         | -          | 0.11            | 0.20                              |
| PT + HF [20]    | -         | -         | -         | -          | 0.10            | 0.21                              |
| KSD [36]        | -         | -         | -         | -          | 0.17            | 0.25                              |
| HF [36]         | -         | -         | -         | -          | 0.13            | 0.19                              |
| ADAM (Default)  | $10^{-3}$ | 0.9       | 0.999     | $10^{-8}$  | $0.09 \pm 0.16$ | $0.16 \pm 0.02$                   |
| ADAM (Modified) | $10^{-3}$ | 0.9       | 0.999     | $10^{-3}$  | $0.12 \pm 0.17$ | $0.17 \pm 0.01$                   |
| YOGI (Ours)     | $10^{-2}$ | 0.9       | 0.9       | $10^{-3}$  | $0.11 \pm 0.01$ | <b><math>0.15 \pm 0.01</math></b> |
| YOGI (Ours)     | $10^{-2}$ | 0.9       | 0.999     | $10^{-3}$  | $0.20 \pm 0.01$ | $0.25 \pm 0.02$                   |

Table 6: Test accuracy for DeepSets on ModelNet40. Standard errors with  $2\sigma$  are shown over 6 runs are shown. All our experiments were run for 500 epochs utilizing the ReduceLRonPlateau schedule with patience of 20 epochs and decay factor of 0.5 with a batch size of 128. Also we report numbers from original paper for reference, which employs a highly tuned learning rate schedule.

| Method          | LR                 | $\beta_1$ | $\beta_2$ | $\epsilon$ | Test Accuracy (%)                  |
|-----------------|--------------------|-----------|-----------|------------|------------------------------------|
| Adam [39]       | -                  | -         | -         | -          | $87.0 \pm 1.0$                     |
| ADAM (Default)  | $10^{-3}$          | 0.9       | 0.999     | $10^{-8}$  | $87.71 \pm 0.25$                   |
| ADAM (Modified) | $10^{-3}$          | 0.9       | 0.999     | $10^{-3}$  | $88.41 \pm 0.33$                   |
| YOGI (Ours)     | $10^{-2}$          | 0.9       | 0.999     | $10^{-3}$  | $87.65 \pm 0.15$                   |
| YOGI (Ours)     | $5 \times 10^{-3}$ | 0.9       | 0.999     | $10^{-3}$  | <b><math>88.73 \pm 0.28</math></b> |

Table 7: Test F1 score for Named Entity Recognition task using CNN-LSTM-CRF model on BC5CDR bio-medical dataset. Standard errors with  $2\sigma$  calculated over 6 runs are shown. All our experiments were run for 50 epochs utilizing the ReduceLRonPlateau schedule with patience of 10 epochs and decay factor of 0.5 with a batch size of 2000 words. We also report performance score from one the best performing approaches for reference, which employs a highly tuned learning rate schedule.

| Method          | LR        | $\beta_1$ | $\beta_2$ | $\epsilon$ | Test F1 (%)                        |
|-----------------|-----------|-----------|-----------|------------|------------------------------------|
| SGD [37]        | -         | -         | -         | -          | 88.78                              |
| ADAM (Default)  | $10^{-3}$ | 0.9       | 0.999     | $10^{-8}$  | $88.75 \pm 0.23$                   |
| ADAM (Modified) | $10^{-3}$ | 0.9       | 0.999     | $10^{-3}$  | $88.86 \pm 0.22$                   |
| YOGI (Ours)     | $10^{-2}$ | 0.9       | 0.999     | $10^{-3}$  | <b><math>89.20 \pm 0.17</math></b> |
